# Supplementary material for: The Unliganded Glucocorticoid Receptor Positively Regulates the Tumor Suppressor Gene BRCA1 through GABP Beta
Source: Oxford University Press journal article supplement (doi:10.1158/1541-7786.mcr-11-0423-t), 2012-02-11
Supplement: 15417786mcr110423t-sup-mcr_11-0423-t_t1_55k.pdf [file 15417786mcr110423t-sup-mcr_11-0423-t_t1_55k.pdf]

## Supplementary Data

**Table 1:** Primers used to construct shGR

| Primer Name | Sequence 5' to 3'                                                    |
|-------------|----------------------------------------------------------------------|
| GRshRNA5'   | GATCCAAGTGATTGCAGCAGTGAAATTTCAAGAGA<br>ATTTCACTGCTGCAATCACTTTTTGGAAA |
| GRshRNA3'   | AGCTTTTCCAAAAAGTGATTGCAGCAGTGAAATTC<br>TCTTGAAATTTCACTGCTGCAATCACTTG |

**Table 2:** Primers used to construct pFLAG-GR $\alpha$

| Primer Name       | Sequence 5' to 3'                      |
|-------------------|----------------------------------------|
| GR $\alpha$ 5'(+) | GGGCGGCCGCGATGGACTCCAAAGAATCATTA ACTCC |
| GR $\alpha$ 5'(-) | GAGCAAATGCCATAAGAAACATCC               |
| GR $\alpha$ 3'(+) | GGCAATACCAGGTTTCAGGAACTTACACC          |
| GR $\alpha$ 3'(-) | GGGGATCCGTCCTTTTGATGAAACAGAAG          |

**Table 3:** Primers used to construct GR deletion series

| Primer Name           | Sequence 5' to 3'                     |
|-----------------------|---------------------------------------|
| hGR $\alpha$ 5' TAD   | GGGGATCCTTATGGACTCCAAAGAATCATTA ACTCC |
| hGR $\alpha$ 5' DBD   | GGGGATCCTCTGCCTGGTGTGCTCTGATGAAGC     |
| hGR $\alpha$ 5' Hinge | GGGGATCCTTCAGGCTGGAATGAACCTGGAAGCTCG  |
| hGR $\alpha$ 5' LBD   | GGGGATCCCACA ACTCACCCCTACCCTGG        |
| hGR $\alpha$ 3' TAD   | GGGCGGCCGCTCAGAGTTTGGGAGGTGGTCC       |
| hGR $\alpha$ 3' DBD   | GGGCGGCCGCTCACATTCCAGCCTGAAGACATTTTCG |
| hGR $\alpha$ 3' Hinge | GGGCGGCCGCTCATGGTAACGTTGCAGGAACTATTG  |
| hGR $\alpha$ 3' LBD   | GGGCGGCCGCTCACTTTTGATGAAACAGAAG       |

**Table 4:** Primers used to construct GABP beta deletion series

| Primer Name          | Sequence 5' to 3'                        |
|----------------------|------------------------------------------|
| hGABP $\beta$ 5' ANK | GGGGATCCTTATGTCCCTGGTAGATTTGGGAAAGAAGC   |
| hGABP $\beta$ 5' CT  | GGGGATCCAAAGTAAATTTTGTA AACTGC           |
| hGABP $\beta$ 5' AD  | GGGGATCCTTGATGGTGCCATTCAGCAAGTAG         |
| hGABP $\beta$ 5' LZ  | GGGGATCCTTGAGAGAGAAGCTCTTCAGAAACAGC      |
| hGABP $\beta$ 3' ANK | GGGCGGCCGCTTATTTGCGTGTGTACATCAGCAC       |
| hGABP $\beta$ 3' CT  | GGGCGGCCGCTTACACAGATTCTGCAGTAACTACTTC    |
| hGABP $\beta$ 3' AD  | GGGCGGCCGCTTAAAGCTGGTGGTTCTTCACTTATAACAG |
| hGABP $\beta$ 3' LZ  | GGGCGGCCGCTTAAACAGCTTCTTTATTAGTCTG       |

**Table 5:** Quantitative real-time PCR primers for human *BRCA1* assay

| Primer Name   | Sequence 5' to 3'                 |
|---------------|-----------------------------------|
| BRCA1 5697 FU | AGATGTGTGAGGCACCTGTGG             |
| BRCA1 5728 RL | CACTCTAAGCTCCTGGCACTGGTAGAG(FAM)G |
| HPRT1 273 FU  | GCTGAGGATTTGGAAAGGGTGT            |
| HPRT1 318 RL  | CCATCTCCTTCATCACATCT(JOE)G        |

Note: FAM and JOE are fluorescent dyes used to label the primers

**Table 6:** Quantitative real-time PCR primers for mouse *BRCA1* assay

| Primer Name | Sequence 5' to 3'       |
|-------------|-------------------------|
| mBRCA1-fwd  | GCAGCTGTGTGGGGCTTCCGTG  |
| mBRCA1-rev  | GTTGCTGTCTTCTGTCCAGGCGC |
| mTBP-fwd    | GGCCTCTCAGAAGCATCACTA   |
| mTBP-fwd    | GCCAAGCCCTGAGCATAA      |
